# Supplementary material
Source: PubMed Central journal article supplement (PMC10885014)
Supplement: NIHMS1965447-supplement-supplementary_material.pdf [file NIHMS1965447-supplement-supplementary_material.pdf]

**Supplemental information**

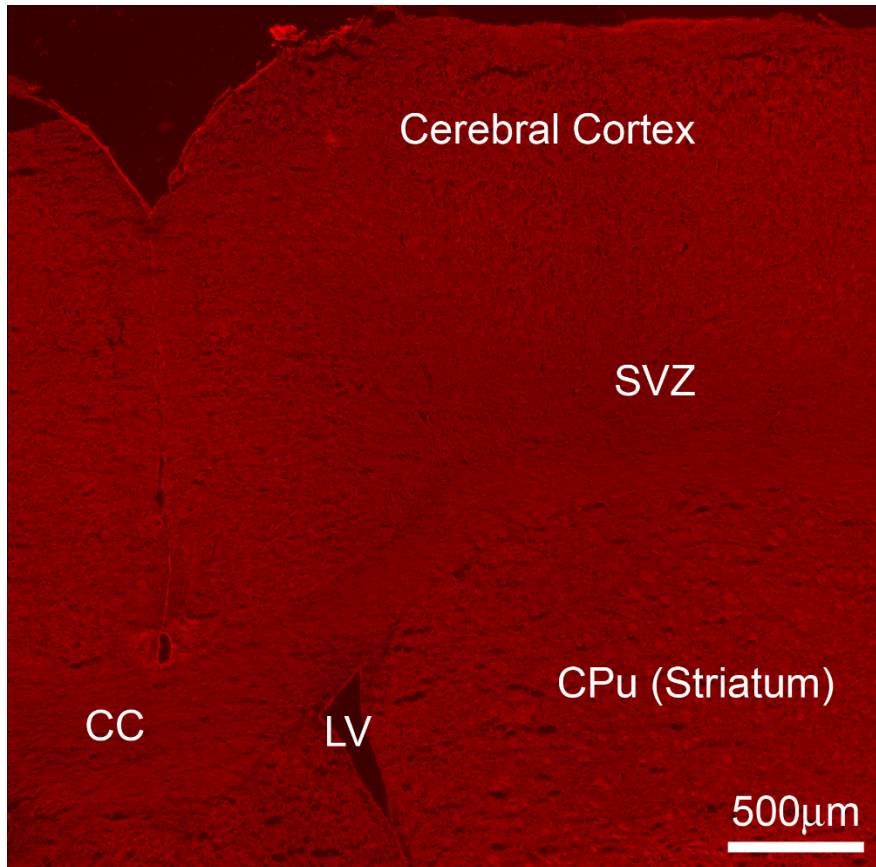

**Figure S1. An example of negative control staining.**

Negative staining was performed without adding a primary antibody. CC = corpus callosum; SVZ = subventricular zone; CPu = Caudate Putamen.

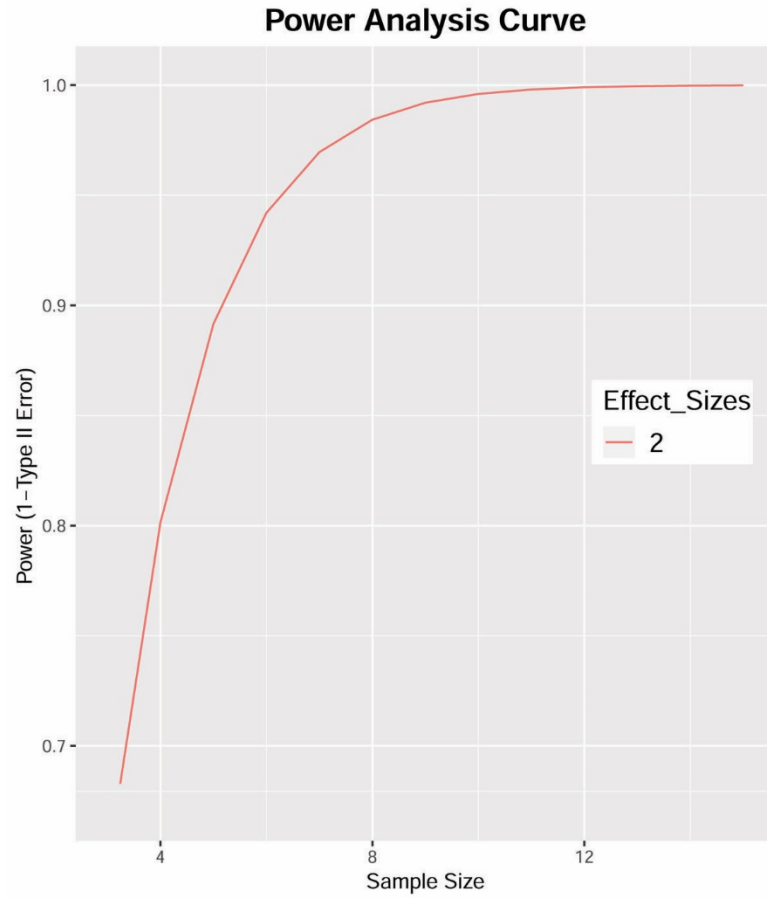

**Supplemental Figure 2. Power analysis to determine animal sample size.**
